# Supplementary material for: Detection of Janus-activated kinase-1 and its interacting proteins by the method of luminescent oxygen channeling
Source: Royal Society of Chemistry journal article supplement (doi:10.1039/c6ra27424b), 2017-01-01
Supplement: c6ra27424b1.pdf [file c6ra27424b1.pdf]

## Supplemental Data Section

### *Detection of JAK1 and its interacting proteins by the method of luminescent oxygen channeling*

Xin-Xin Guo, Han-Tao Wu, Si-Hui Zhuang, Zhen-Hua Chen, Rong-Liang Liang, Yao Chen, Ying-Song Wu, Tian-Cai Liu\*

Table S1. Primers used for gene cloning

| Primers Name | Oligonucleotide Sequence                |
|--------------|-----------------------------------------|
| Jak1-F       | 5' GCCGCGATCGCCATGCAGTATCTAAATATAAAAG   |
| Jak1-R       | 5' GCATGCGCATTTTTAAAAGTGCTTCAAATCCT 3'  |
| Stat3-F      | 5' GCCGCGATCGCCCGCCATGGCCCAATGGAATCA 3' |
| Stat3-R      | 5' GCATGCGCATCATGGGGGAGGTAGCGCACTC 3'   |

F, forward; R, reverse

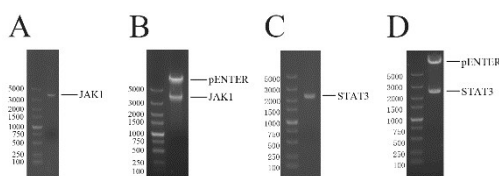

Figure S1. Identification of recombinant plasmids by PCR and enzyme digestion

(A) Restriction map of pENTER-JAK1 PCR product (B) Restriction enzyme analysis of pENTER-JAK1 (C) Restriction map of pENTER-STAT3 PCR product (D) Restriction enzyme analysis of pENTER-STAT3.

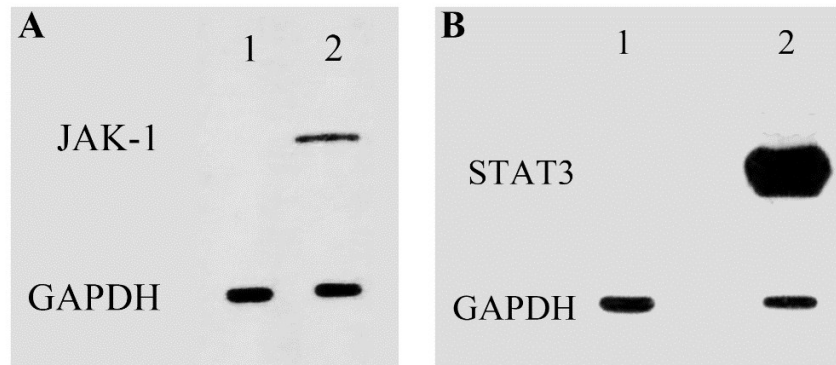

**Figure S2. (A) Expression of JAK1 by western blot analysis. Lane 1, blank; lane 2, JAK1. (B) Expression of STAT3 by western blot analysis. Lane 1, blank; lane 2, STAT3.** Equal amounts of lysates were analyzed by Western blot using antibodies against JAK1, STAT3, The same blots were stripped and reprobbed with GAPDH antibody to verify equal protein loading.

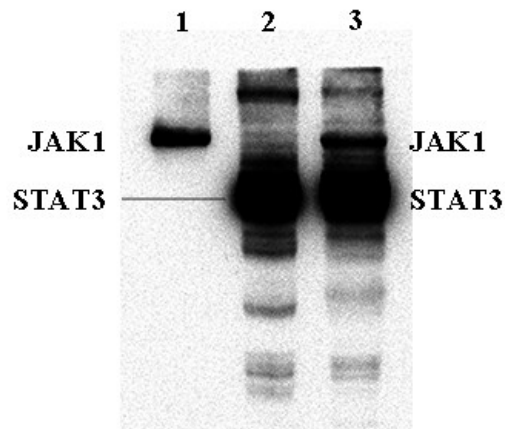

**Figure S3. Expression of co-transfected plasmids**

**Lane 1, JAK1; lane 2, STAT3; lane 3, co-expression of JAK1 and STAT3**

Equal amounts of lysates were analyzed by Western blot using antibodies against JAK1, STAT3, The same blots were stripped and reprobred with GAPDH antibody to verify equal protein loading

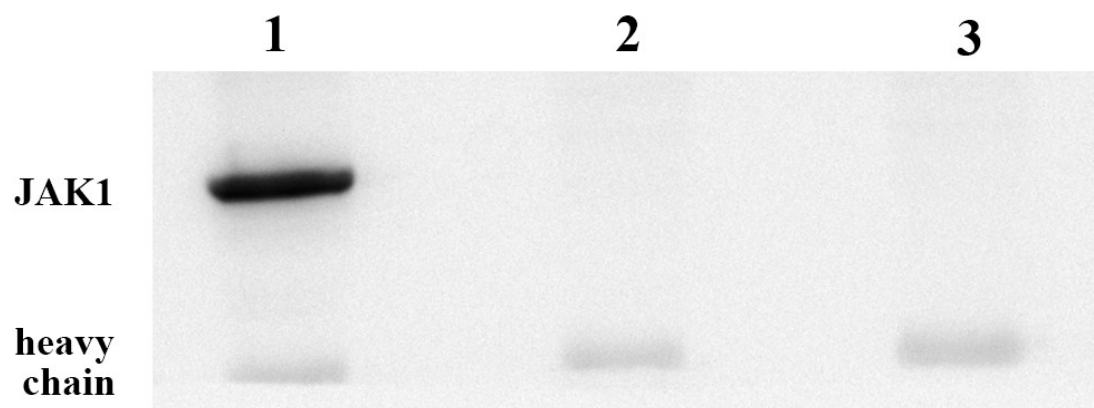

**Figure S4. Co-IP western blot analysis**

**Lane 1, experimental group; lane 2, negative control; lane 3, blank control.**
